# Supplementary material for: First-principles calculations for understanding microstructures and mechanical properties of co-sputtered Al alloys
Source: Royal Society of Chemistry journal article supplement (doi:10.1039/d1nr03333f), 2021-01-01
Supplement: d1nr03333f1.pdf [file d1nr03333f1.pdf]

## First-principles calculations for understanding the microstructures and mechanical properties of co-sputtered Al alloys

Mingyu Gong<sup>a</sup>, Wenqian Wu<sup>a</sup>, Dongyue Xie<sup>a</sup>, Nicholas A. Richter<sup>b</sup>, Qiang Li<sup>b</sup>, Yifan Zhang<sup>b</sup>,  
Sichuang Xue<sup>b</sup>, Xinghang Zhang<sup>b</sup>, Jian Wang<sup>a,\*</sup>

<sup>a</sup> Mechanical and Materials Engineering, University of Nebraska-Lincoln, Lincoln, NE 68588, USA

<sup>b</sup> School of Materials Engineering, Purdue University, West Lafayette, IN 47907, USA.

\* Corresponding author: Jian Wang (jianwang@unl.edu)

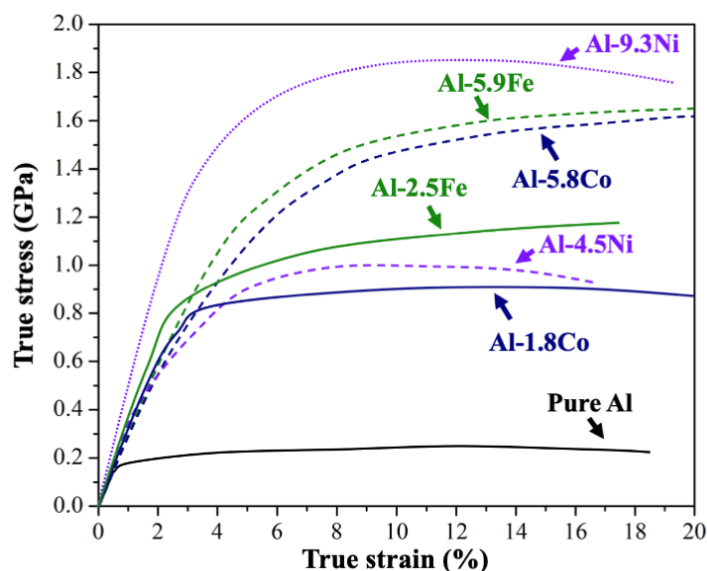

**Figure S1.** True stress-true strain curve associated with nanoindentation of sputtered Al-Fe, Al-Co and Al-Ni alloys.
